# Supplementary material for: TYGS is an automated high-throughput platform for state-of-the-art genome-based taxonomy
Source: PubMed Central journal article supplement (PMC6522516; doi:10.1038/s41467-019-10210-3), 2019-05-16
Supplement: 41467_2019_10210_MOESM4_ESM.pdf [file 41467_2019_10210_MOESM4_ESM.pdf]

## Description of Additional Supplementary Files

**File Name:** Supplementary Data 1

**Description:** This table contains the 16S rRNA gene sequence similarities among the type strains of the analysed *Mycobacterium* dataset.

**File Name:** Supplementary Data 2

**Description:** This table contains the 16S rRNA gene sequence similarities among the type strains of the analysed *Salmonella* dataset.

**File Name:** Supplementary Data 3

**Description:** This table contains the data used for the generation of Supplementary Figure 4.
